# Supplementary material for: Direct growth of mesoporous carbon-coated Ni nanoparticles on carbon fibers for flexible supercapacitors
Source: Royal Society of Chemistry journal article supplement (doi:10.1039/c4ta05668j), 2014-12-03
Supplement: c4ta05668j1.pdf [file c4ta05668j1.pdf]

## Electronic Supplementary Information

# Direct Growth of Mesoporous Carbon-coated Ni Nanoparticles on Carbon Fibers for Flexible Supercapacitors

Jun Li,<sup>a,b</sup> Yuhang Wang,<sup>a</sup> Jing Tang,<sup>a</sup> Yang Wang,<sup>a</sup> Tianyu Wang,<sup>a</sup> Lijuan Zhang,<sup>a</sup> and Gengfeng Zheng\*<sup>a</sup>

<sup>a</sup>Laboratory of Advanced Materials, Department of Chemistry, Fudan University, Shanghai, 200433, China. <sup>b</sup>School of Pharmacy, Fudan University, Shanghai, 201203, China.  
E-mail: gfzheng@fudan.edu.cn.

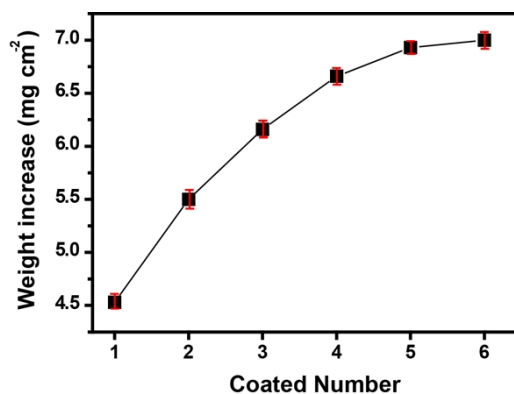

**Figure S1.** Mass per area of the Ni@C nanocomposite directly grown on carbon fibers versus coating times.

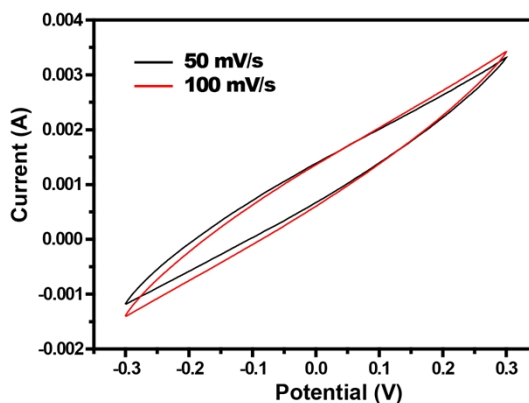

**Figure S2.** Cyclic voltammetry curves of pure carbon fiber at different scan rates.

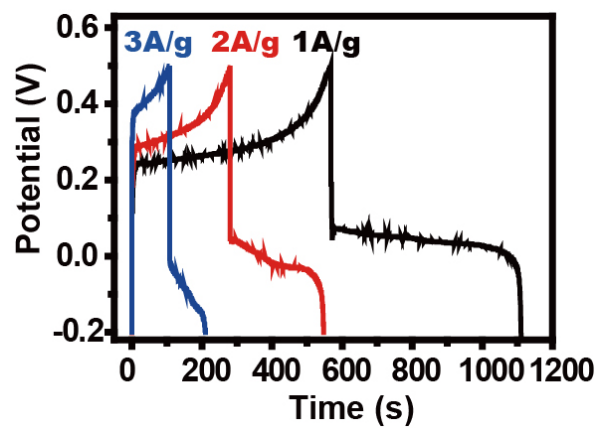

**Figure S3.** The galvanostatic measurement of mesoporous Ni@C composite grown on CFs without CCB treated.

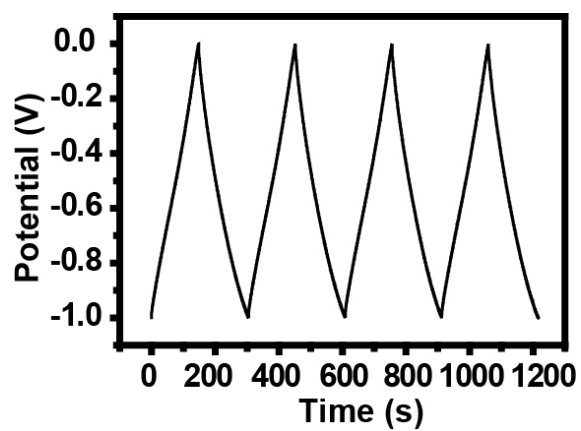

**Figure S4.** The galvanostatic measurement AC-based electrode at a discharge current of 1 A/g.
